# Supplementary material
Source: PubMed Central journal article supplement (PMC3380599)
Supplement: supp_mcs103_mcs103supp.pdf [file supp_mcs103_mcs103supp.pdf]

## SUPPLEMENTARY DATA

TABLE S1. List of primers used

| Primer ID   | Primer sequence 5'-3'                                                                 |
|-------------|---------------------------------------------------------------------------------------|
| ZmSP-1      | CACCTATGGGATCCCTCGTTAATAACATCATGGTCGTGGGCGCCGTCTTGCGGCGCTCGTCGCCGGCGGGTCGTGC          |
| ZmSP-2      | GGTACCTCTAGAGCACGACCCGCCGGCGACGAGCGCCGCAAGGACGGCGCCCACGACCATGATGTTATTAACGAGGGATCCCATA |
| ZmSP_F      | GAATTCATGCGATCCCTCGTTAATAA                                                            |
| ZmSP_R      | GGTACCCCATGGGTGACGACGTCGCACGACCCGCCGGCGACGA                                           |
| GFP_F       | GGGACTCTAGAGGATCCGAAGGAGATATA                                                         |
| GFP_R       | GAGGGCCCCTAGTAACATAGATGACACCG                                                         |
| ZmUbiP_F1   | GAGCTCGCGGCCGCTTTTGCAAATAGCTTCACCT                                                    |
| ZmUbiP_R1   | ACTAGTCACTAGTACCTGCAGAAGTA                                                            |
| ZmUbiP_F2   | CTGAGCTCTTTTGCAAATAGCTTCACCT                                                          |
| ZmUbiP_R2   | GCGGCCGCCACTAGTACCTGCAGAAGTA                                                          |
| AnAF_Forw   | TGAGAAACCTCAGTACCTGG                                                                  |
| AnAF_Rev    | CTTCAGGGTGAGGAGCCCTG                                                                  |
| AnGL_Forw   | TGTTCCGCTCAACGGCTACGGT                                                                |
| AnGL_Rev    | CTGCCTTTCTAAGAAGACCAC                                                                 |
| AnRAE_Forw  | TGAAATCCATCGCTCTTACC                                                                  |
| AnRAE_Rev   | CAAGCATTACCGTCGAAATC                                                                  |
| pUbiP_Rev3  | CAGTTTAAACTATCAGTGTT                                                                  |
| pUbiP_Rev2  | CATGATCAGATTGTCGTTTC                                                                  |
| pUbiP_Rev1  | ACGTGACTCCCTTAATTCTC                                                                  |
| pUbiP_Forw2 | ATCCCCCTGGCTGCAGGAAT                                                                  |
| pUbiP_Forw1 | CGTCACCGAGATCTGATGAC                                                                  |

TABLE S2. Flanking sequence tags obtained from transiently expressing plants.

|                                   |                                                                                                                                                                                                                                                                 |                                                                                                                                                                                                                                                                                                                                              |
|-----------------------------------|-----------------------------------------------------------------------------------------------------------------------------------------------------------------------------------------------------------------------------------------------------------------|----------------------------------------------------------------------------------------------------------------------------------------------------------------------------------------------------------------------------------------------------------------------------------------------------------------------------------------------|
| <b>AnGL</b><br>expressing plant.  | T-DNA insertion localized in <i>Brachypodium distachyon</i> uncharacterized locus LOC100827459 predicted to encode 2226 bp mRNA (GenBank ID: XM_003565782) and located in the Chromosome 2 (GenBank ID: NC_016132.1)                                            | nnnnnnnnnnnnnnnggennntgggcccgacgtcgcgatgctcccggccgcatggcggccgcgggaattc<br>gattc <b>CTTCAGTTTAAACTATCAGTGTTTGACAGGATATATTGGCGGGTAAACCTATGTGCCGCTGGCCGGTGAAATACAATCCGGCGATACAGTAA</b><br><b>GCCTTGCTGTAACGGTGTGGTTACCGGTAGCCACACCGCTGAACGTAGGGCTTGACTGGTAGGCACCACCATCCAATGCGTACTCATAATTTATACCCAACGGCTGCTTACACTTATGGTACCTGAAGATACCGATNNNNTC</b> |
| <b>AnAF</b><br>expressing plant.  | T-DNA insertion localized in <i>Brachypodium distachyon</i> uncharacterized locus LOC100843429 predicted to encode 6384 bp mRNA (GenBank ID: XM_003581200) and located in the Chromosome 5 (GenBank ID: NC_016135.1)                                            | nnnnnnnnnnnnnnntnaangagctctcccatatggtcgacctgcagggccgccaatt <b>AGTTTAAACTATCAGTGTTTGACAGGATATATTGGCGGGTAAACCTGCCGTTCCGGCCGACGAGCCGCGTCCGGCCGCCTCGAAGCTCCCTTCCCCACGGGCGGCGGGCTGAATCCTTTGCAGACGACTTAAATACGCGACGGGGCATTGTAAGTGGCAGAGTGGCCTTGCTGCCACGATCCACTGAG</b>                                                                               |
| <b>AnRAE</b><br>expressing plant. | T-DNA insertion localized in <i>Brachypodium distachyon</i> locus LOC100826424 predicted to encode 4955 bp mRNA of sister chromatid cohesion protein PDS5 homolog B-B-like (GenBank ID: XM_003565782) and located in the Chromosome 1 (GenBank ID: NC_016131.1) | nnnnnnnnnnnnnnnagggnnantgggcccgacgtcgcgatgctcccggccgcatggc <b>TCAGTTTAAACTATCAGTGTTTGACAGGATATATTGGCGGGTACCACACCAGCAA</b><br><b>AAGACAATGATGAGATTTTAGTAAATTCTGTCAACACAGAAAAAATAAATCTTTGGAAAGCAAGTTGAAGAAGGAGAAAAAGCAGAGCT</b>                                                                                                                |

FIG. S1. Negative controls for enzyme activity assays.

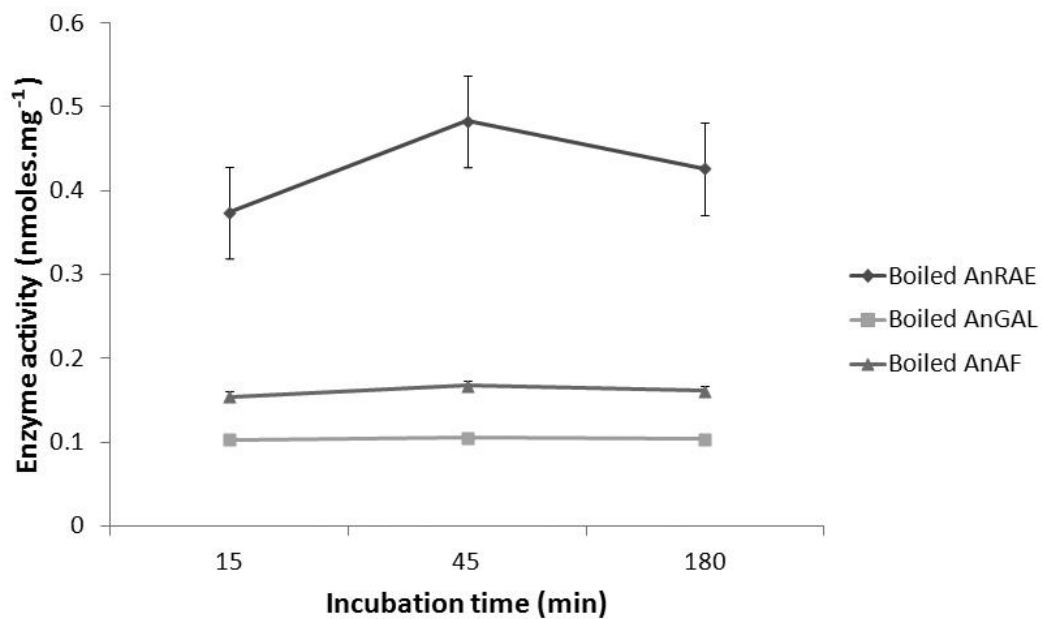

Apoplasmic fluid containing each enzyme type was boiled and incubated with appropriate substrate: AnRAE with pNP-acetyl; AnGAL with pNP- $\alpha$ -galactopyranoside; and AnAF with pNP-arabinoside. Mean  $\pm$  standard deviation ( $n = 6$ ).
